# Supplementary material for: Fabrication and design of new redox active azure A/3D graphene aerogel and conductive trypan blue–nickel MOF nanosheet array electrodes for an asymmetric supercapattery
Source: Royal Society of Chemistry journal article supplement (doi:10.1039/d1ta02850b), 2021-01-01
Supplement: d1ta02850b1.pdf [file d1ta02850b1.pdf]

*Supporting information for*

**Fabrication and design of new redox active azure A/3D graphene aerogel and  
conductive trypan blue–nickel MOF nanosheet array electrodes for an  
asymmetric supercapattery**

Tahereh Sadeghian Renani<sup>1</sup>, Seyyed Mehdi Khoshfetrat<sup>2</sup>, Jalal Arjomandi<sup>1,3,\*</sup>, Hu Shi<sup>3</sup>, Sadegh  
Khazalpour<sup>4</sup>

<sup>1</sup>Department of Physical Chemistry, Faculty of Chemistry, Bu-Ali Sina University,  
65178 Hamedan, Iran

<sup>2</sup>Chemistry Department, Faculty of Science, Ayatollah Boroujerdi University, Boroujerd, Iran

<sup>3</sup>School of Chemistry and Chemical Engineering, Shanxi University, Taiyuan, China

<sup>4</sup>Department of Analytical Chemistry, Faculty of Chemistry, Bu-Ali Sina University,  
65178 Hamedan, Iran

\*To whom correspondence should be addressed, E-mail: [j\\_arjomandi@basu.ac.ir](mailto:j_arjomandi@basu.ac.ir),  
(ORCID.ID: 0000-0002-7287-1927), Tel: +988138288807, Fax: +988138257407

---

**Figure and Table Captions**

**Fig. S1.** UV-vis absorption of (a) pure Az, GO, Az/GO and (b) Try, Ni<sub>3</sub>(Cl)<sub>2</sub>(OH)<sub>4</sub> and Try-Ni-MOF aqueous solutions.

**Fig. S2.** UV-vis. absorption spectra of (a) pure azure A and Az/GA and (b) pure trypan blue and Try-Ni-MOF in 3.0 M KOH solution using three electrode cell setup after completing 500 galvanostatic charge-discharge cycles, respectively.

**Fig. S3.** XRD patterns of (a) GO, GA, and Az–GA and (b) Try, Ni<sub>3</sub>Cl<sub>2</sub>(OH)<sub>4</sub>, and the Try–Ni-MOF.

**Fig. S4.** SEM images of GO.

**Fig. S5.** N<sub>2</sub> adsorption/desorption isotherms of the (a) GA and Az-GA, and (b) Ni<sub>3</sub>Cl<sub>2</sub>(OH)<sub>4</sub> and Try-Ni-MOF samples. The insets are BJH pore size distribution curves.

**Fig. S6.** EDS spectra of the (a) GO, (b) Az-GA and mapping of the AZ-GA sample.

**Fig. S7.** EDS spectra and mapping of the (a) Ni<sub>3</sub>Cl<sub>2</sub>(OH)<sub>4</sub> and (b) Try-Ni-MOF.

**Fig. S8.** Raman spectra of a) GO, GA and AZ-GA and b) Ni<sub>3</sub>Cl<sub>2</sub>(OH)<sub>4</sub> and Try-Ni-MOF samples.

**Fig. S9.** TGA curves of (a) GO, GA and Az-GA and (b) Ni<sub>3</sub>Cl<sub>2</sub>(OH)<sub>4</sub> and Try-Ni-MOF samples in air at a heating rate of 5 °C min<sup>-1</sup>.

**Fig. S10.** Suggested mechanism for electrochemical oxidation of (A) Az to B, C or D compounds.

**Fig. S11.** (a) CVs of the Az-GA electrodes with different azure A to GO ratios from 0.04 to 1 wt% at scan rate of 10 mV s<sup>-1</sup> and (b) change in specific capacitance as a function of the wt% azure A to GO ratios for Az-GA/NF electrodes.

**Fig. S12.** CVs of Ni<sub>3</sub>Cl<sub>2</sub>(OH)<sub>4</sub>/NF electrode in three-electrode cell setup in aqueous 3.0 m KOH electrolyte at various scan rates from 5 to 100 mV s<sup>-1</sup>.

**Fig. S13.** (a) CVs of the Try-Ni-MOF electrodes with different NiCl<sub>2</sub>.6H<sub>2</sub>O to trypan blue ratios (1:1, 1:2, 1:4, 1:5, and 1:6) at scan rate of 10 mV s<sup>-1</sup> and (b) change in specific capacitance as a function of the NiCl<sub>2</sub>.6H<sub>2</sub>O to trypan blue ratios for Try-Ni-MOF/NF electrodes.

**Fig. S14.** (a and c) the voltammetric charge (*c*) versus scan rate (*v*<sup>-1/2</sup>) and (b and d) 1/*c*(*v*) versus *v*<sup>1/2</sup> plots for Az-GA/NF and Try-Ni-MOF/NF electrode, according to Trasatti method.

**Fig. S15.** (a, d) GCD of the GA/NF and Ni<sub>3</sub>Cl<sub>2</sub>(OH)<sub>4</sub>/NF electrodes at different current densities in an aqueous 3.0 M KOH electrolyte, (b, e) long-term cycling stability of the GA/NF, Az-GA/NF, Ni<sub>3</sub>Cl<sub>2</sub>(OH)<sub>4</sub>/NF, and Try-Ni-MOF/NF electrodes over 5000 cycles at a current density of 10 A g<sup>-1</sup> in an aqueous 3.0 M KOH electrolyte, and (c, f) Bode plots (log |*Z*| vs. log frequency and phase angle vs. log frequency) for the GA/NF, Az-GA/NF, Ni<sub>3</sub>Cl<sub>2</sub>(OH)<sub>4</sub>/NF, and Try-Ni-MOF/NF electrodes at a frequency range from 100 KHz to 10 mHz, respectively.

**Fig. S16.** Equivalent circuit models used to fit the experimental EIS data of the (a) GA/NF and Az-GA/NF and (b) Ni<sub>3</sub>Cl<sub>2</sub>(OH)<sub>4</sub>/NF and Try-Ni-MOF/NF electrodes in a three-electrode system and in an aqueous 3.0 M KOH electrolyte, respectively.

**Fig. S17.** (a) Az-GA (negative pole) and Try-Ni-MOF (positive pole) electrodes measured at a scan rate of  $10 \text{ mV s}^{-1}$  in three-electrode configurations, (b) CV curves of the Az-GA//Try-Ni-MOF asymmetric device at different potential windows  $10 \text{ mV s}^{-1}$ , (c) GCDs of a Az-GA//Try-Ni-MOF asymmetric device at different potential windows, and (d) specific capacitances of Az-GA//Try-Ni-MOF asymmetric device at various current densities.

**Table S1.** The d-spacing and crystallite size of GO, GA, Az-GA,  $\text{Ni}_3\text{Cl}_2(\text{OH})_4$ , and Try-Ni-MOF.

**Table S2.** Comparison of the electrochemical performances of the Az-GA electrode with other anode electrode reported literatures.

**Table S3.** Comparison of the electrochemical performances of the Try-Ni-MOF electrode with other cathode electrode reported literatures.

**Table S4.** Values of equivalent circuit parameters for the GA and Az-GA electrodes.

**Table S5.** Values of equivalent circuit parameters for the  $\text{Ni}_3\text{Cl}_2(\text{OH})_4$  and Try-Ni-MOF electrodes.

**Table S6.** Comparison of the electrochemical performances of the Az-GA//Try-Ni-MOF device with other devices.

## Videos S1

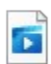

Films.m4v

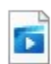

Film 2.m4v

## Characterization of materials

**Bragg equation:  $n\lambda = 2d \sin(\theta)$**

where,  $n$  is the order of reflection and can be small integers (number of crystal pages),  $\lambda$  is the wavelength of the X-ray that moves the electron or neutron,  $d$  is the empty space between atoms,  $\theta$  is the angle at which the reflected beams have the greatest amplitude with respect to the initial beams.

**Scherrer equation:  $D = K\lambda/(B \cos\theta)$**

Where D is the mean size of the ordered (crystalline) domains, K is a dimensionless shape factor, with a value close to unity (about 0.9),  $\lambda$  is the X-ray wavelength,  $\beta$  is the line broadening at half the maximum intensity (FWHM), after subtracting the instrumental line broadening, in radians,  $\theta$  is the Bragg angle.

**Bragg equation:  $n\lambda = 2d \sin(\theta)$**

where, n is the order of reflection and can be small integers (number of crystal pages),  $\lambda$  is the wavelength of the X-ray that moves the electron or neutron, d is the empty space between atoms,  $\theta$  is the angle at which the reflected beams have the greatest amplitude with respect to the initial beams.

**Scherrer equation:  $D = K\lambda / (\beta \cos\theta)$**

Where D is the mean size of the ordered (crystalline) domains, K is a dimensionless shape factor, with a value close to unity (about 0.9),  $\lambda$  is the X-ray wavelength,  $\beta$  is the line broadening at half the maximum intensity (FWHM), after subtracting the instrumental line broadening, in radians,  $\theta$  is the Bragg angle.

### **Reactions:**

The urea was hydrolyzed into  $\text{NH}_4^+$ ,  $\text{OH}^-$  and  $\text{CO}_2$  during the hydrothermal process (**Reaction 1**). Then, the resulting  $\text{NH}_4^+$ ,  $\text{OH}^-$  reacted with  $\text{NiCl}_2$  to formed porous  $\text{Ni}_3\text{Cl}_2(\text{OH})_4$  nanosheets (**Reaction 2**). According to the **Reaction 3**, it can be noted that the pseudocapacitive behavior of the compound is mainly attributed to the oxidation and reduction properties of  $\text{Ni}^{2+}$  and  $\text{Ni}^{3+}$ . The CVs (**Fig. S12**) show the redox behavior of  $\text{Ni}_3\text{Cl}_2(\text{OH})_4/\text{NF}$  electrode and reduction of  $\text{Ni}^{2+}$ .

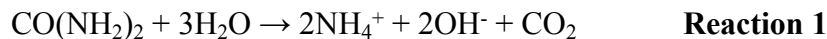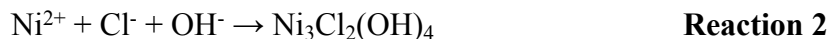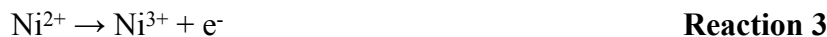

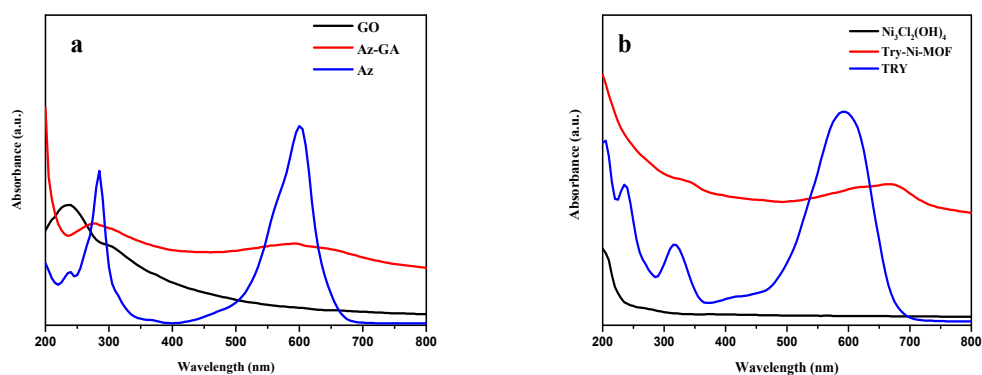

**Fig. S1.** UV-vis absorption of (a) pure Az, GO, Az/GO and (b) Try,  $\text{Ni}_3(\text{Cl})_2(\text{OH})_4$  and Try-Ni-MOF aqueous solutions.

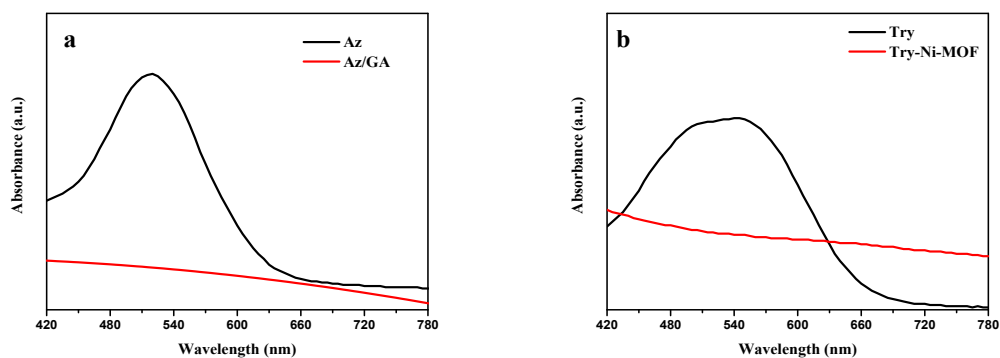

**Fig. S2.** UV-vis. absorption spectra of (a) pure azure A and Az/GA and (b) pure trypan blue and Try-Ni-MOF in 3.0 M KOH solution using three electrode cell setup after completing 500 galvanostatic charge-discharge cycles, respectively.

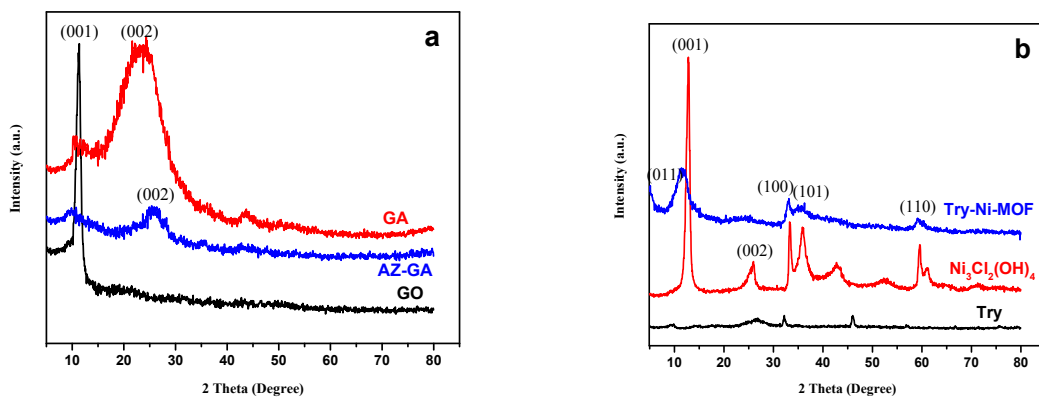

**Fig. S3.** XRD patterns of (a) GO, GA, and Az-GA and (b) Try,  $\text{Ni}_3\text{Cl}_2(\text{OH})_4$ , and the Try-Ni-MOF.

---

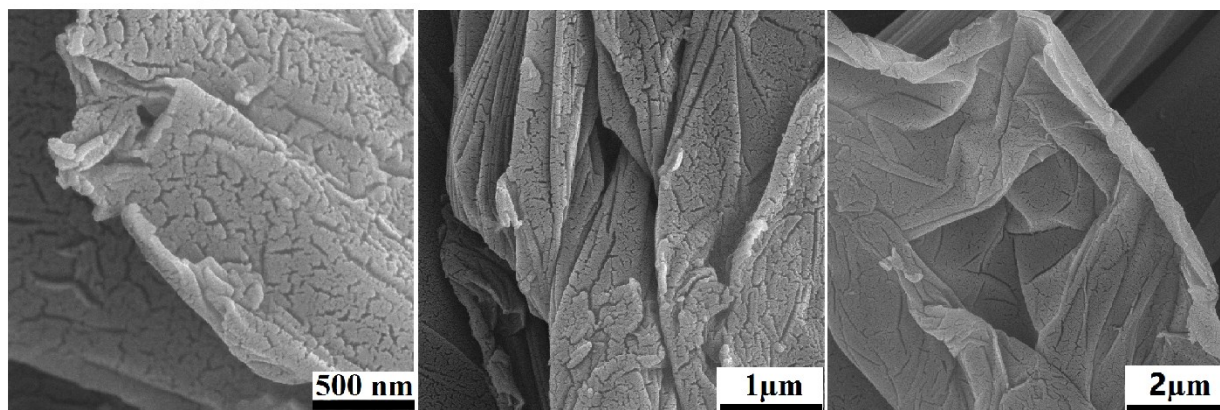

**Fig. S4.** SEM images of GO

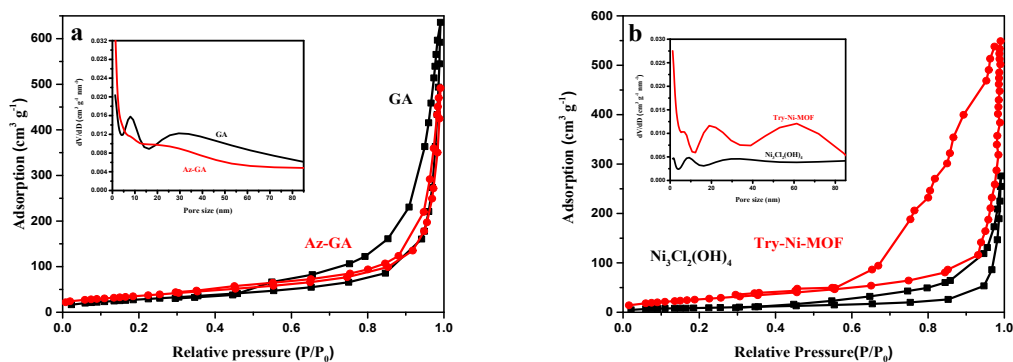

**Fig. S5.**  $\text{N}_2$  adsorption/desorption isotherms of the (a) GA and Az-GA, and (b)  $\text{Ni}_3\text{Cl}_2(\text{OH})_4$  and Try-Ni-MOF samples. The insets are BJH pore size distribution curves.

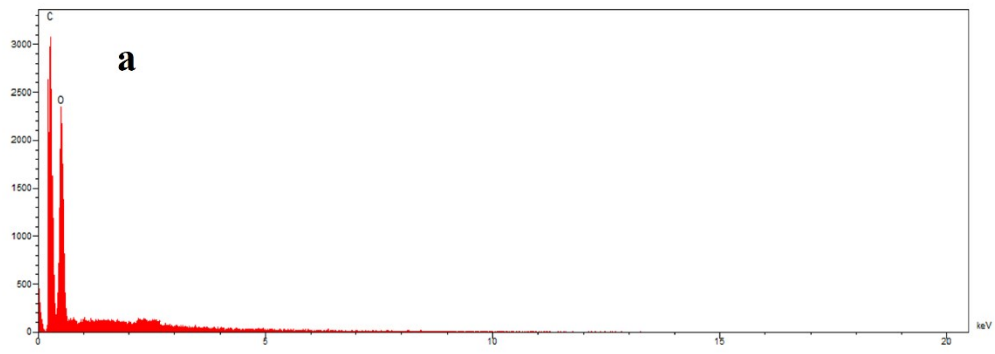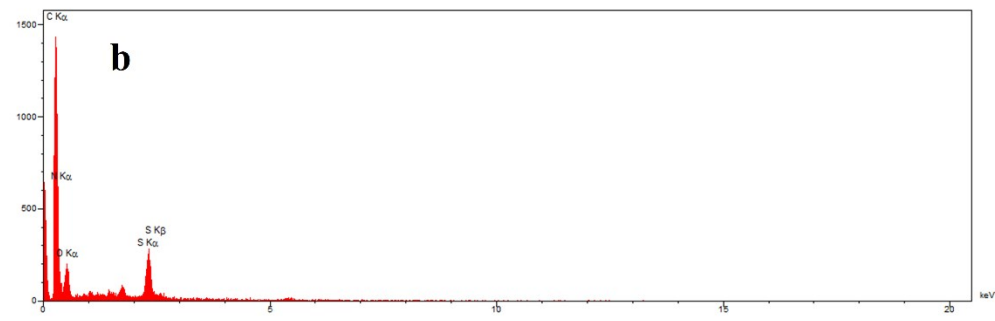

**Fig. S6.** EDS spectra of the (a) GO and (b) Az-GA

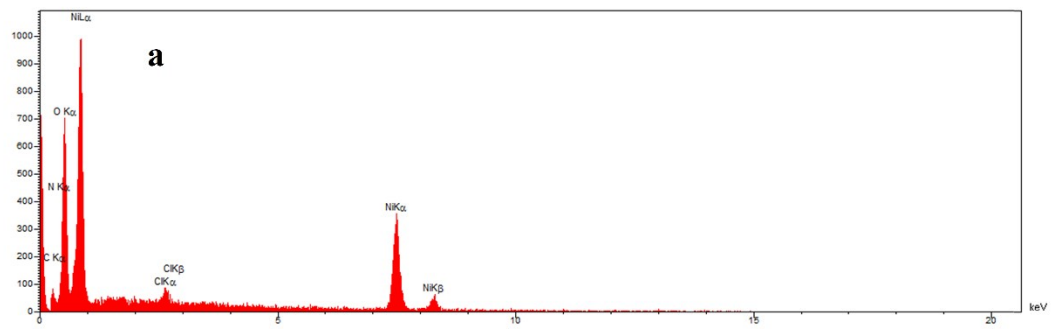



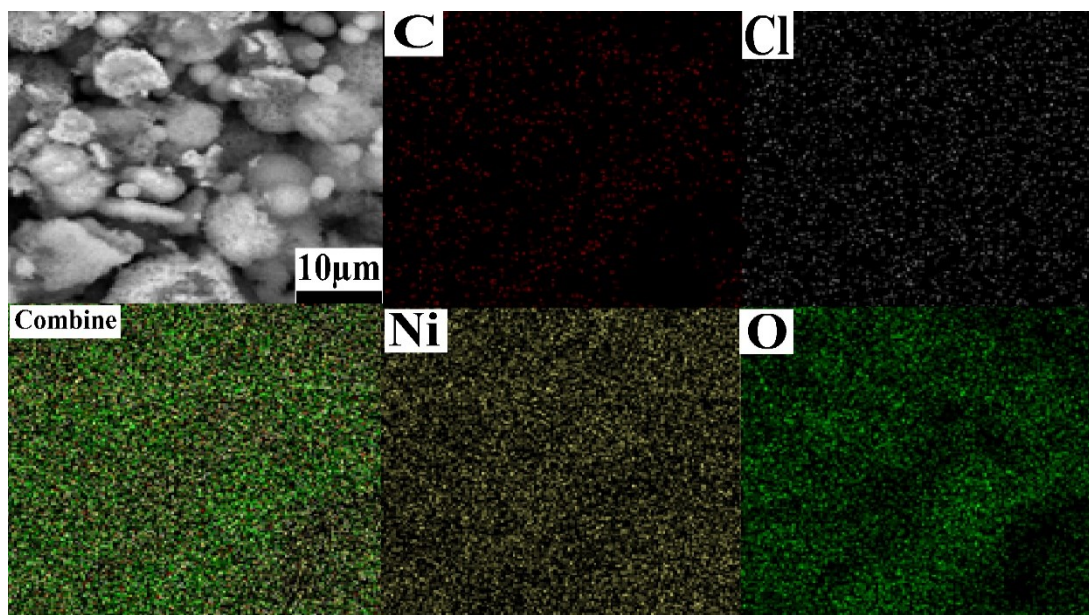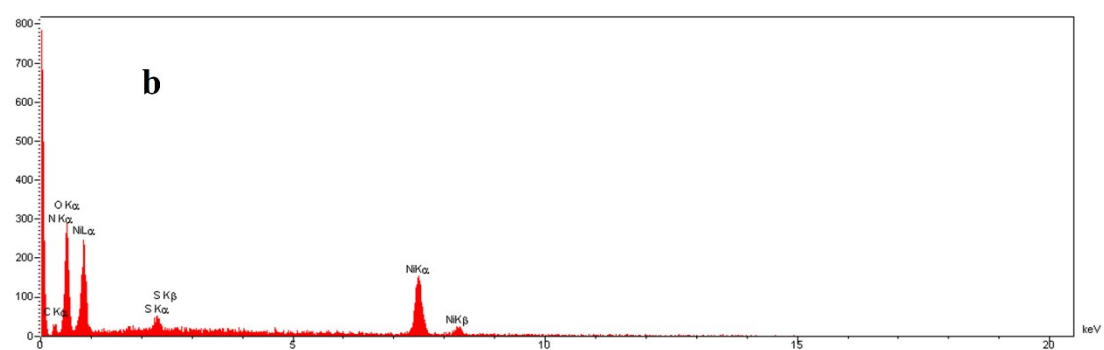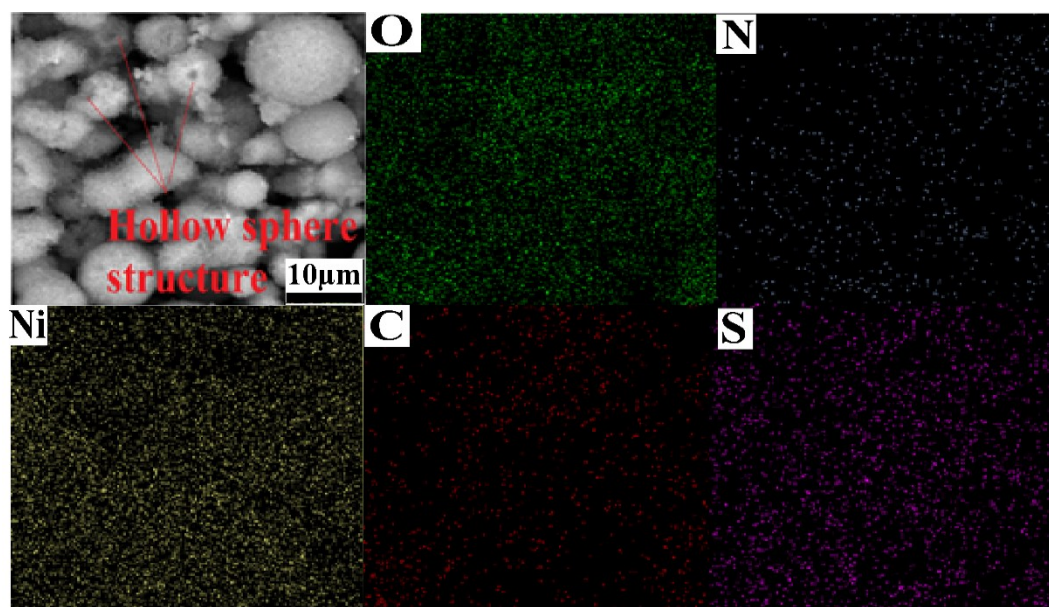

**Fig. S7.** EDS spectra and mapping of the (a)  $\text{Ni}_3\text{Cl}_2(\text{OH})_4$  and (b) Try-Ni-MOF.



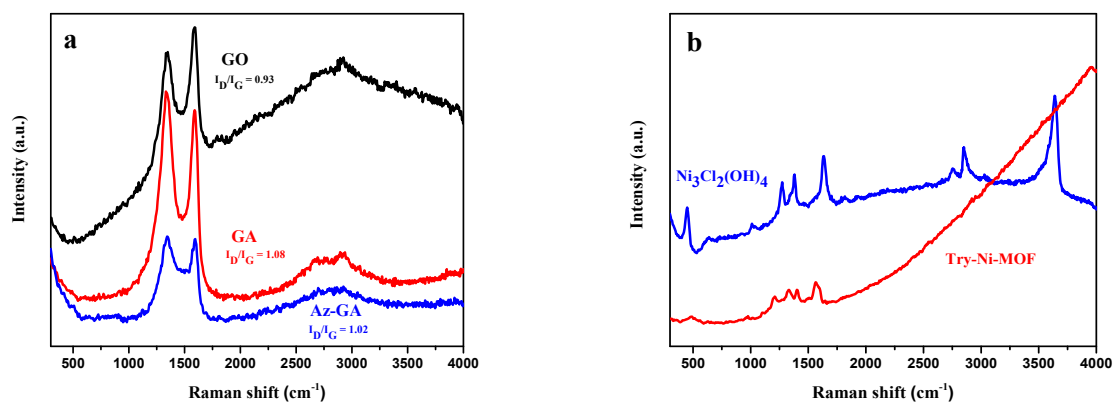

**Fig. S8.** Raman spectra of a) GO, GA and AZ-GA and b)  $\text{Ni}_3\text{Cl}_2(\text{OH})_4$  and Try-Ni-MOF samples.

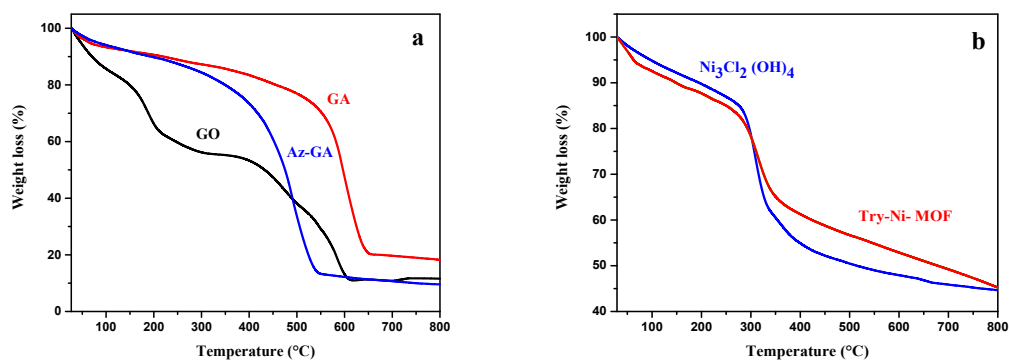

**Fig. S9.** TGA curves of (a) GO, GA and AZ-GA and (b)  $\text{Ni}_3\text{Cl}_2(\text{OH})_4$  and Try-Ni-MOF samples in air at a heating rate of  $5\text{ }^{\circ}\text{C min}^{-1}$ .

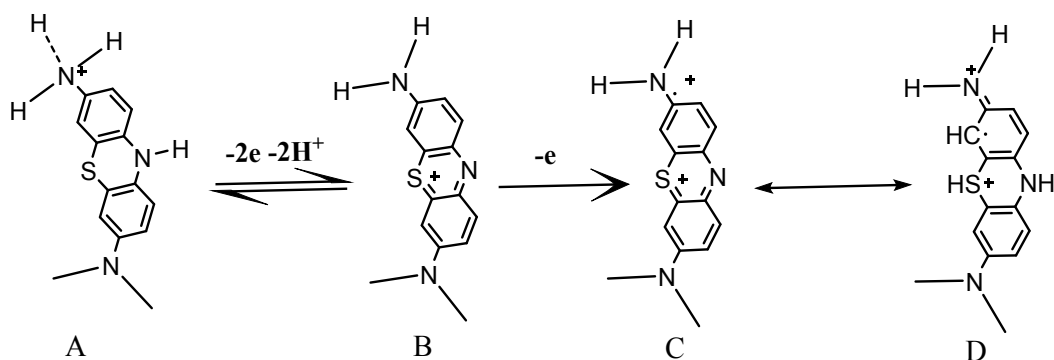

**Fig. S10.** Suggested mechanism for electrochemical oxidation of (A) Az to B, C or D compounds.

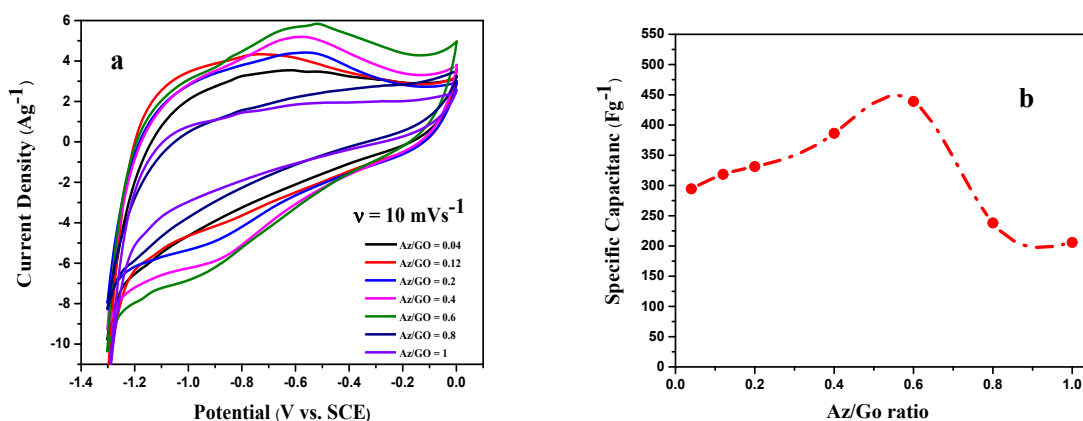

**Fig. S11.** (a) CVs of the Az-GA electrodes with different azure A to GO ratios from 0.04 to 1 wt% at scan rate of  $10 \text{ mV s}^{-1}$  and (b) change in specific capacitance as a function of the wt% azure A to GO ratios for Az-GA/NF electrodes.

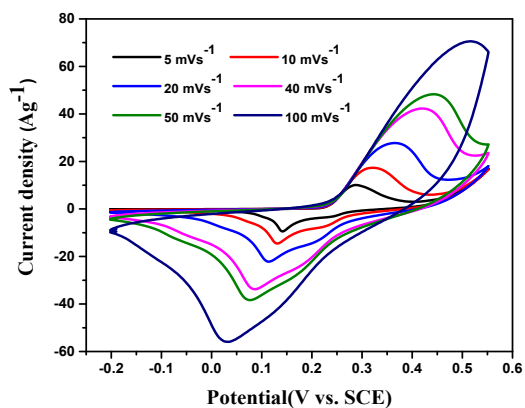

**Fig. S12.** CVs of  $\text{Ni}_3\text{Cl}_2(\text{OH})_4/\text{NF}$  electrode in three-electrode cell setup in aqueous 3.0 m KOH electrolyte at various scan rates from 5 to  $100 \text{ mV s}^{-1}$ .

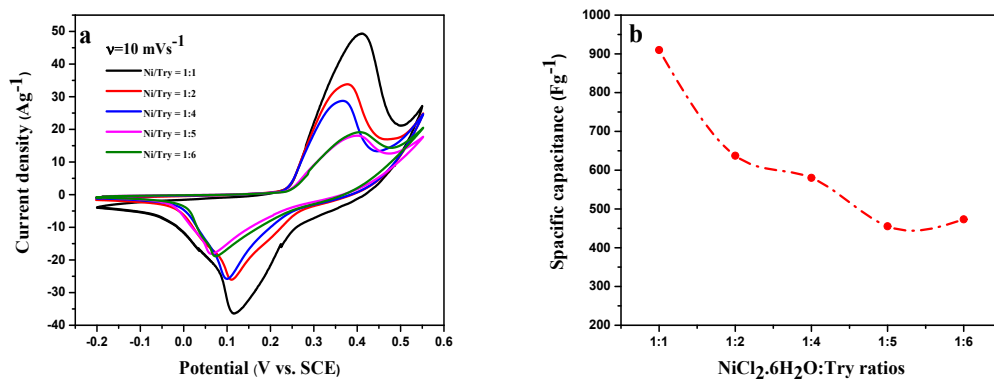

**Fig. S13.** (a) CVs of the Try-Ni-MOF electrodes with different NiCl<sub>2</sub>·6H<sub>2</sub>O to trypan blue ratios (1:1, 1:2, 1:4, 1:5, and 1:6) at scan rate of 10 mV s<sup>-1</sup> and (b) change in specific capacitance as a function of the NiCl<sub>2</sub>·6H<sub>2</sub>O to trypan blue ratios for Try-Ni-MOF/NF electrodes.

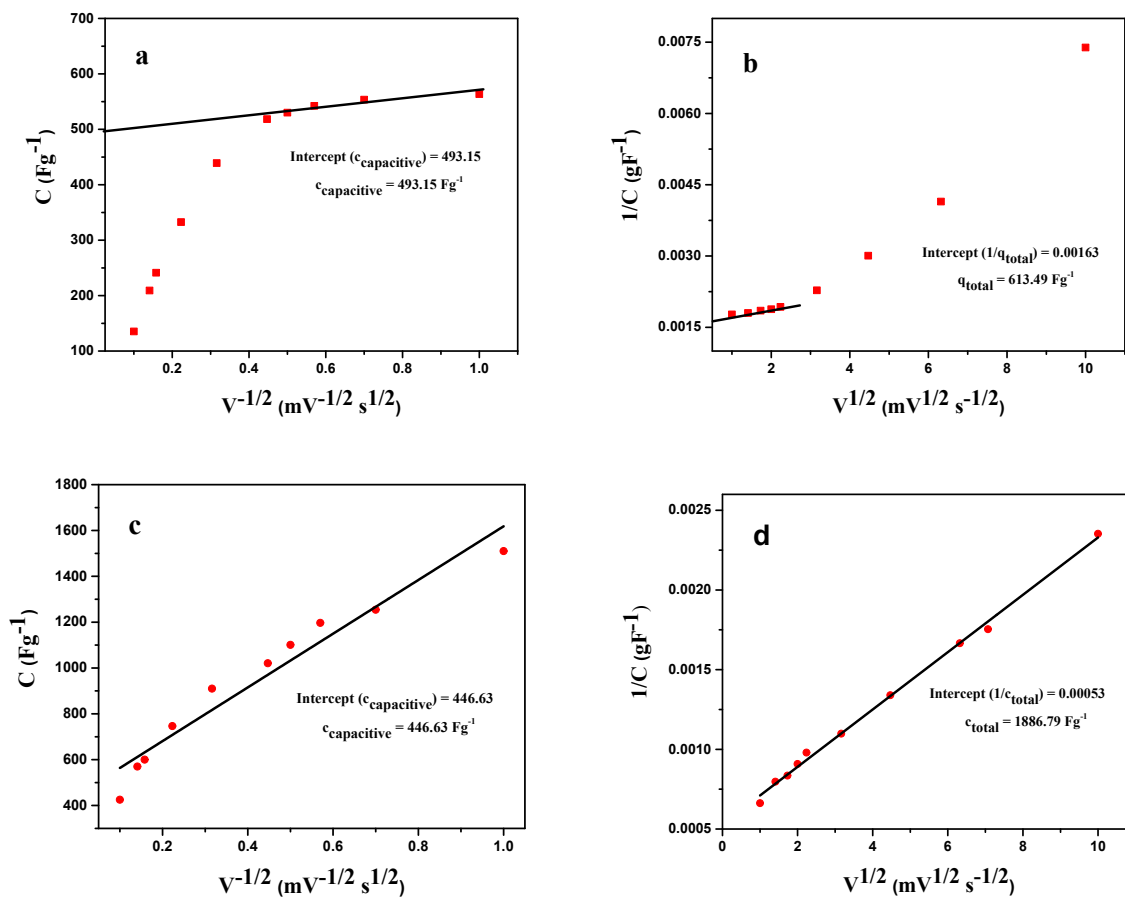

**Fig. S14.** (a and c) the voltammetric charge ( $c$ ) versus scan rate ( $v^{-1/2}$ ) and (b and d)  $1/c(v)$  versus  $v^{1/2}$  plots for Az-GA/NF and Try-Ni-MOF/NF electrode, according to Trasatti method.

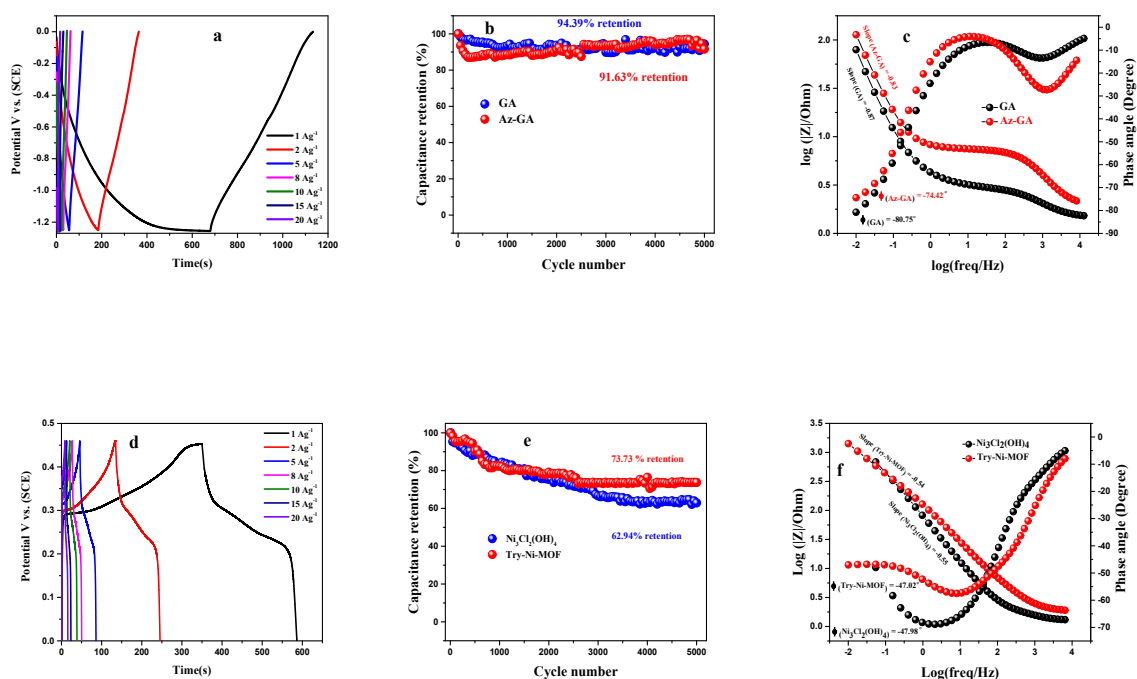

**Fig. S15.** (a, d) GCD of the GA/NF and  $\text{Ni}_3\text{Cl}_2(\text{OH})_4/\text{NF}$  electrodes at different current densities in an aqueous 3.0 M KOH electrolyte, (b, e) long-term cycling stability of the GA/NF, Az-GA/NF,  $\text{Ni}_3\text{Cl}_2(\text{OH})_4/\text{NF}$ , and Try-Ni-MOF/NF electrodes over 5000 cycles at a current density of  $10 \text{ A g}^{-1}$  in an aqueous 3.0 M KOH electrolyte, and (c, f) Bode plots ( $\log |Z|$  vs.  $\log$  frequency and phase angle vs.  $\log$  frequency) for the GA/NF, Az-GA/NF,  $\text{Ni}_3\text{Cl}_2(\text{OH})_4/\text{NF}$ , and Try-Ni-MOF/NF electrodes at a frequency range from 100 KHz to 10 mHz, respectively.

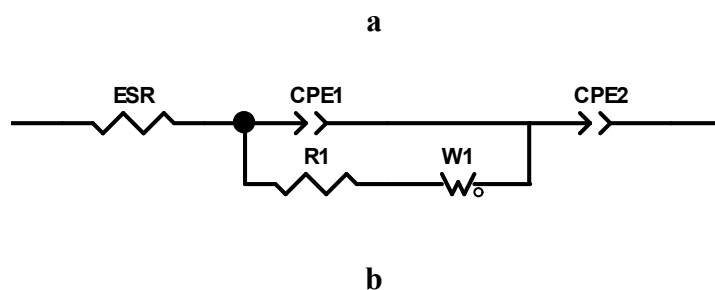

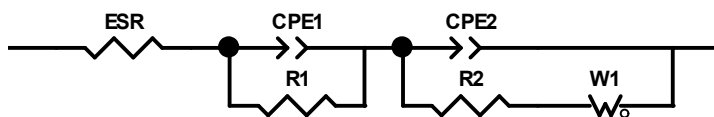

**Fig. S16.** Equivalent circuit models used to fit the experimental EIS data of the (a) GA/NF and Az-GA/NF and (b)  $\text{Ni}_3\text{Cl}_2(\text{OH})_4/\text{NF}$  and Try-Ni-MOF/NF electrodes in a three-electrode system and in an aqueous 3.0 M KOH electrolyte, respectively.

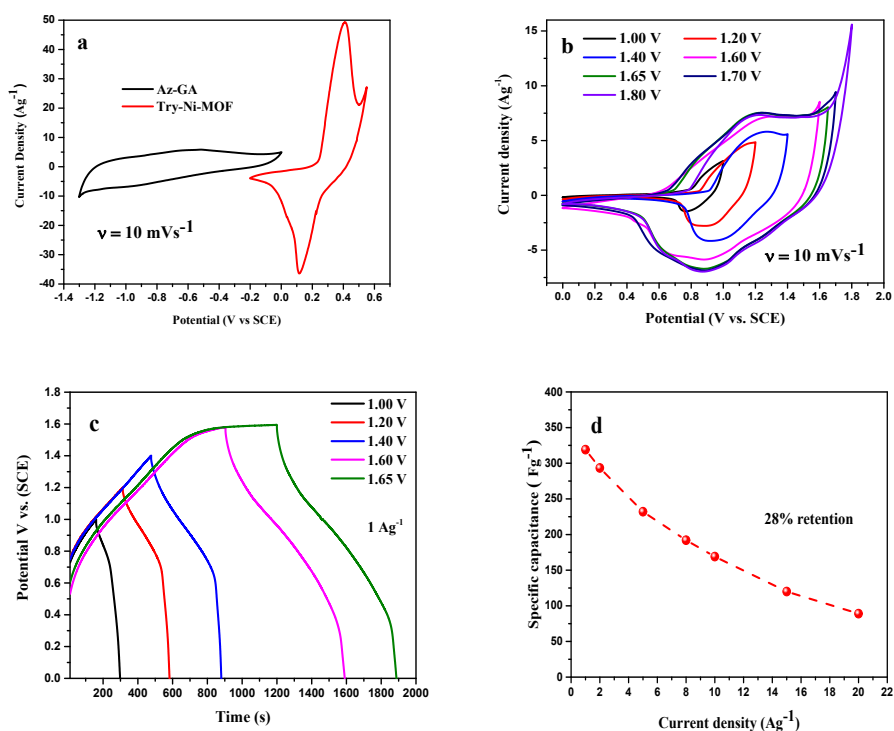

**Fig. S17.** (a) Az-GA (negative pole) and Try-Ni-MOF (positive pole) electrodes measured at a scan rate of  $10 \text{ mV s}^{-1}$  in three-electrode configurations, (b) CV curves of the Az-GA//Try-Ni-MOF asymmetric device at different potential windows  $10 \text{ mV s}^{-1}$ , (c) GCDs of a Az-GA//Try-Ni-MOF asymmetric device at different potential windows, and (d) specific capacitances of Az-GA//Try-Ni-MOF asymmetric device at various current densities.

**Table S1** The d-spacing and crystallite size of GO, GA, Az-GA, Ni<sub>3</sub>Cl<sub>2</sub>(OH)<sub>4</sub>, and Try-Ni-MOF.

| Dataset Name                                      | Pos. [ $\theta$ ] | Height [cts] | FWHM Left [ $\theta$ .] | d-spacing [ $\text{\AA}$ ] | d- mean size [nm] |
|---------------------------------------------------|-------------------|--------------|-------------------------|----------------------------|-------------------|
| GO                                                | 11.36(9)          | 2688.85      | 1.200                   | 7.84613                    | -                 |
| GA                                                | 24.36(2)          | 2056.6       | 0.64                    | 3.65065                    | -                 |
| Az-GA                                             | 26.41(1)          | 585.0        | 0.7230                  | 3.38550                    | -                 |
| Ni <sub>3</sub> Cl <sub>2</sub> (OH) <sub>4</sub> | 12.8784           | 7976.82      | 0.3936                  | 6.87422                    | 5-11              |
| Try-Ni-MOF                                        | 11.588(9)         | 1184(16)     | 2.79(2)                 | 7.63027                    | 2-5               |

**Table S2.** Comparison of the electrochemical performances of the Az-GA electrode with other anode electrode reported literatures.

| Electrode material                                         | Areal capacitance/capacity (F cm <sup>-2</sup> /mA h cm <sup>-2</sup> ) | Specific capacitance/capacity (F g <sup>-1</sup> /mA h g <sup>-1</sup> ) | Current load          | Electrolyte                                                                                                                           | Stability (Cycles)                        | Ref. |
|------------------------------------------------------------|-------------------------------------------------------------------------|--------------------------------------------------------------------------|-----------------------|---------------------------------------------------------------------------------------------------------------------------------------|-------------------------------------------|------|
| <b>NiCo<sub>2</sub>O<sub>4</sub>/GH/NF composite</b>       | 3.84 F cm <sup>-2</sup>                                                 | 3428 F g <sup>-1</sup>                                                   | 2 mA cm <sup>-2</sup> | 0.008 M NiCl <sub>2</sub> .6H <sub>2</sub> O, 0.016 M CoCl <sub>2</sub> .6H <sub>2</sub> O, and 0.1 M Na <sub>2</sub> SO <sub>4</sub> | -                                         | 1    |
| <b>FGS<sup>a</sup>-SSG<sup>b</sup>/PANI</b>                | 1.36 F cm <sup>-2</sup>                                                 | 491.3 F g <sup>-1</sup>                                                  | 0.5 A g <sup>-1</sup> | 1.0 M H <sub>2</sub> SO <sub>4</sub>                                                                                                  | 86% at 50 mVs <sup>-1</sup> (3,000)       | 2    |
| <b>Fe<sub>3</sub>O<sub>4</sub>/graphene nanocomposites</b> | -                                                                       | 300 F g <sup>-1</sup>                                                    | 0.4 A g <sup>-1</sup> | 1.0 M KOH                                                                                                                             | 93% at 0.4 A g <sup>-1</sup> (500 cycles) | 3    |
| <b>SG<sup>c</sup>/PANI</b>                                 | -                                                                       | 478 F g <sup>-1</sup>                                                    | 0.5 A g <sup>-1</sup> | 1.0 M H <sub>2</sub> SO <sub>4</sub>                                                                                                  | 88% at                                    | 4    |

|                                                                                  |                          |                          |                        |                                                                 |                                                 |           |
|----------------------------------------------------------------------------------|--------------------------|--------------------------|------------------------|-----------------------------------------------------------------|-------------------------------------------------|-----------|
| <b>nanocomposite papers</b>                                                      |                          |                          |                        |                                                                 | 0.5 A g <sup>-1</sup><br>(2,000)                |           |
| <b>Th–GA<sup>d</sup> nanocomposite</b>                                           | -                        | 512 F g <sup>-1</sup>    | 1 A g <sup>-1</sup>    | 1.0 M H <sub>2</sub> SO <sub>4</sub>                            | 82%<br>at<br>1 A g <sup>-1</sup><br>(6,000)     | 5         |
| <b>Graphene encapsulated NiS/Ni<sub>3</sub>S<sub>4</sub> (NSG) nanostructure</b> | -                        | 827 F g <sup>-1</sup>    | 5 A g <sup>-1</sup>    | 6.0 M KOH                                                       | 88%<br>at<br>5 A g <sup>-1</sup><br>(5,000)     | 6         |
| <b>3-D GPCN nanosheets<sup>e</sup></b>                                           | -                        | 316.8 F g <sup>-1</sup>  | 1 A g <sup>-1</sup>    | 1.0 M KOH                                                       | 92.5%<br>at<br>1 A g <sup>-1</sup><br>(2,000)   | 7         |
| <b>MnO<sub>2</sub>/VGNs<sup>f</sup>/Ni hybrid</b>                                | 186 mFcm <sup>-2</sup>   | -                        | 1 mA cm <sup>-2</sup>  | 0.1 M MnSO <sub>4</sub> and 1 M Na <sub>2</sub> SO <sub>4</sub> | 60%<br>at<br>100 mVs <sup>-1</sup><br>(10,000)  | 8         |
| <b>RGO/Ni<sub>3</sub>S<sub>2</sub>/MoS<sub>2</sub> composite</b>                 | 6451 mF·cm <sup>-2</sup> | -                        | 40 mA·cm <sup>-2</sup> | 2.0 M KOH                                                       | 87.2%<br>at 110 mA·cm <sup>-2</sup><br>(5,000)  | 9         |
| <b>NiFe/rGO</b>                                                                  | -                        | 1224 F g <sup>-1</sup>   | 10 mVs <sup>-1</sup>   | 1.0 M KOH                                                       | 89% at 10 mVs <sup>-1</sup><br>(2,000)          | 10        |
| <b>GA<sup>g</sup>@NF</b>                                                         | -                        | 366 F g <sup>-1</sup>    | 2 A g <sup>-1</sup>    | 6.0 M KOH                                                       | 60%<br>at<br>10 A g <sup>-1</sup><br>(2,000)    | 11        |
| <b>Az-GA</b>                                                                     | -                        | 716.06 F g <sup>-1</sup> | 1 A g <sup>-1</sup>    | 3.0 M KOH                                                       | 94.39%<br>at<br>10 A g <sup>-1</sup><br>(5,000) | This work |

<sup>a</sup> FGS : Flexible graphite sheet, <sup>b</sup> SSG : Self-supporting graphene, <sup>c</sup> SG :Sulfonate graphene, <sup>d</sup> Th–GA : Thionine–Graphene aerogel, <sup>e</sup> 3-D GPCN nanosheets : Three-dimensional graphene-like porous carbon nanosheets, <sup>f</sup> VGNs : Vertical graphene nanosheets, <sup>g</sup> GA : Graphene aerogel

**Table S3.** Comparison of the electrochemical performances of the Try-Ni-MOF electrode with other cathode electrode reported literatures.



| Electrode material                                                          | Areal capacitance / capacity (F cm <sup>-2</sup> /mA h cm <sup>-2</sup> ) | Specific capacitance / capacity (F g <sup>-1</sup> /mA h g <sup>-1</sup> ) | Current load                          | Electrolyte                                                    | Stability (Cycles)                      | Ref. |
|-----------------------------------------------------------------------------|---------------------------------------------------------------------------|----------------------------------------------------------------------------|---------------------------------------|----------------------------------------------------------------|-----------------------------------------|------|
| <b>Ni<sub>4.5</sub>Co<sub>4.5</sub>S<sub>8</sub> (Ni battery)</b>           | -                                                                         | 206 mAh g <sup>-1</sup>                                                    | 1 A g <sup>-1</sup>                   | 4.0 M KOH                                                      | 95% at 20 A g <sup>-1</sup> (5,000)     | 12   |
| <b>Ni(OH)<sub>2</sub>/NG<sup>a</sup> (Ni battery)</b>                       |                                                                           | 230 mAh g <sup>-1</sup>                                                    | 1 A g <sup>-1</sup>                   | 1.0 M KOH                                                      | 93% at 10 mV <sup>-1</sup> (1,000)      | 13   |
| <b>LiNi<sub>0.5</sub>Mn<sub>1.5</sub>O<sub>4</sub> (Li-ion battery)</b>     | -                                                                         | 144 mAh g <sup>-1</sup>                                                    | 150 mA g <sup>-1</sup>                | LiPF <sub>6</sub> in Ethylene carbonate and dimethyl carbonate | 90% at 300 mA g <sup>-1</sup> (250)     | 14   |
| <b>Ni-MH (Ni battery)</b>                                                   | -                                                                         | 276 mAh g <sup>-1</sup>                                                    | 0.1 C (1 C=183.6 mA g <sup>-1</sup> ) | PVA/ KOH                                                       | -                                       | 15   |
| <b>NiO@Ni<br/>Micro/nanostructures</b>                                      | 92.4 mF cm <sup>-2</sup>                                                  | -                                                                          | 1 mA cm <sup>-2</sup>                 | 2.0 M KOH                                                      | 100% at 4 A g <sup>-1</sup> (1,500)     | 16   |
| <b>NiO/CuO<sub>-0.3</sub>/GO<sub>-30</sub> composites</b>                   | -                                                                         | 1451 F g <sup>-1</sup>                                                     | 1 A g <sup>-1</sup>                   | 6.0 M KOH                                                      | 82.95% at 10 A g <sup>-1</sup> (1,000)  | 17   |
| <b>(Co(OH)<sub>2</sub>/Co<sub>9</sub>S<sub>8</sub>) @ NiTe/Ni composite</b> | 5.28 F cm <sup>-2</sup>                                                   | -                                                                          | 10 mA cm <sup>-2</sup>                | 6.0 M KOH                                                      | 87.80% at 50 A g <sup>-1</sup> (10,000) | 18   |
| <b>Ni-Co-S/NF nanosheet</b>                                                 | -                                                                         | 1406.9 F g <sup>-1</sup>                                                   | 0.5 A g <sup>-1</sup>                 | 1.0 M KOH                                                      | 88.6% at 10 A g <sup>-1</sup> (1,000)   | 19   |
| <b>NiO</b>                                                                  | -                                                                         | 523 F g <sup>-1</sup>                                                      | 1 A g <sup>-1</sup>                   | 6.0 M KOH                                                      | 77.25% at 10 A g <sup>-1</sup> (1,000)  | 17   |
| <b>Co<sup>2+</sup>/Co<sup>3+</sup>- doped Ni(OH)<sub>2</sub> branched</b>   | -                                                                         | 999 F g <sup>-1</sup>                                                      | 2 A g <sup>-1</sup>                   | 3.0 M                                                          | 82% at                                  | 20   |

|                                             |   |                          |                     |           |                                                 |               |
|---------------------------------------------|---|--------------------------|---------------------|-----------|-------------------------------------------------|---------------|
| <b>nanosheets-interlaced structure</b>      |   |                          |                     | KOH       | 10 A g <sup>-1</sup><br>(7,000)                 |               |
| <b>2D N-NiO UTNSs<sup>b</sup></b>           | - | 540 F g <sup>-1</sup>    | 1 A g <sup>-1</sup> | 1.0 M KOH | 85% at<br>10 A g <sup>-1</sup><br>(10,000)      | <sup>21</sup> |
| <b>NiCoP/NPC HFSs<sup>c</sup> composite</b> | - | 660.3 F g <sup>-1</sup>  | 1 A g <sup>-1</sup> | 3.0 M KOH | 85% at<br>6 A g <sup>-1</sup><br>(2,000)        | <sup>22</sup> |
| <b>Try-Ni-MOF</b>                           | - | 845.43 F g <sup>-1</sup> | 1 A g <sup>-1</sup> | 3.0 M KOH | 73.73%<br>at<br>10 A g <sup>-1</sup><br>(5,000) | This work     |

<sup>a</sup> NG : Nitrogen-doped graphene, <sup>b</sup> 2D N-NiO UTNSs : 2D N-doped NiO ultrathin nanosheets, <sup>c</sup> NPC HFSs: N and P atoms with hollow and fold-sphere, <sup>e</sup> :

**Table S4.** Values of equivalent circuit parameters for the GA and Az-GA electrodes

| Sample | ESR (Ω) | R <sub>ct1</sub> (Ω) | CPE <sub>1</sub> (Fs <sup>n-1</sup> ) | n <sub>1</sub> | W (Ω s <sup>-1/2</sup> ) | CPE <sub>2</sub> (Fs <sup>n-1</sup> ) | n <sub>2</sub> |
|--------|---------|----------------------|---------------------------------------|----------------|--------------------------|---------------------------------------|----------------|
| GA     | 1.45    | 1.44                 | 1.4 × 10 <sup>-3</sup>                | 0.75           | 0.27                     | 0.26                                  | 0.92           |
| Az-GA  | 1.87    | 5.50                 | 0.27 × 10 <sup>-3</sup>               | 0.81           | 0.32                     | 0.11                                  | 0.90           |

**Table S5.** Values of equivalent circuit parameters for the Ni<sub>3</sub>Cl<sub>2</sub>(OH)<sub>4</sub> and Try-Ni-MOF electrodes

| Sample                                            | ESR (Ω) | R <sub>ct1</sub> (Ω) | CPE <sub>1</sub> (Fs <sup>n-1</sup> ) | n <sub>1</sub> | W (Ω s <sup>-1/2</sup> ) | R <sub>ct2</sub> (Ω) | CPE <sub>2</sub> (Fs <sup>n-1</sup> ) | n <sub>2</sub> |
|---------------------------------------------------|---------|----------------------|---------------------------------------|----------------|--------------------------|----------------------|---------------------------------------|----------------|
| Ni <sub>3</sub> Cl <sub>2</sub> (OH) <sub>4</sub> | 1.27    | 0.31                 | 1.3 × 10 <sup>-3</sup>                | 0.80           | 1.02                     | 1336                 | 2.7 × 10 <sup>-3</sup>                | 0.80           |
| Try-Ni-MOF                                        | 1.78    | 1.58                 | 2.5 × 10 <sup>-3</sup>                | 0.82           | 0.50                     | 248                  | 1.5 × 10 <sup>-3</sup>                | 0.75           |

**Table S6.** Comparison of the electrochemical performances of the Az-GA//Try-Ni-MOF device with other devices.

| Device<br>(Type)                                                                    | Capacity<br>(mAh g <sup>-1</sup> ) | Capacitance<br>(F g <sup>-1</sup> ) | Specific<br>energy<br>(Wh kg <sup>-1</sup> )<br>at specific<br>power<br>(kW kg <sup>-1</sup> ) | Specific<br>power<br>(kW kg <sup>-1</sup> )<br>at specific<br>energy<br>(Wh kg <sup>-1</sup> ) | Cycles | Capacity<br>retention                    | Electrolyte                | Ref. |
|-------------------------------------------------------------------------------------|------------------------------------|-------------------------------------|------------------------------------------------------------------------------------------------|------------------------------------------------------------------------------------------------|--------|------------------------------------------|----------------------------|------|
| ZCNM-NS <sup>a</sup> //AC <sup>b</sup><br>(battery-<br>supercapacitor hybrid)       | -                                  | 71.3 at 5<br>mA cm <sup>-2</sup>    | 25.3<br>at<br>0.787                                                                            | 9.4<br>at<br>18.4                                                                              | 5,000  | 81.5%<br>at<br>10 mA<br>cm <sup>-2</sup> | 2.0 M<br>KOH               | 23   |
| rG/NCS/NCO <sup>c</sup> //rGO<br>(Asym.<br>supercapacitor)                          | -                                  | 104 at<br>3 A g <sup>-1</sup>       | 32 at<br>0.375                                                                                 | -                                                                                              | 1,000  | 82 % at<br>30 A g <sup>-1</sup>          | PVA-KOH                    | 24   |
| Co(OH) <sub>2</sub> -MoSe <sub>2</sub> //AC<br>(Asym. supercapacitor)               | -                                  | 99 at<br>1 A g <sup>-1</sup>        | 30.12 at<br>0.985                                                                              | 12.2 at<br>18.28                                                                               | 3,000  | 86.2% at<br>10 A g <sup>-1</sup>         | 6.0 M<br>KOH               | 25   |
| ZnFe <sub>2</sub> O <sub>4</sub> //Ni(OH) <sub>2</sub><br>(Asym.<br>supercapacitor) | -                                  | 93 at 0.6<br>mA cm <sup>-2</sup>    | 33 at<br>0.068                                                                                 | 0.209 at<br>14                                                                                 | 1,000  | 88% at 1<br>mA cm <sup>2</sup>           | 6.0 M<br>KOH               | 26   |
| Pd-GA//Ni(OH) <sub>2</sub> (Ni<br>superbattery)                                     | 190 at<br>0.2 A g <sup>-1</sup>    | 429 at<br>0.2 A g <sup>-1</sup>     | 185.7 at<br>38.8 × 10 <sup>-3</sup>                                                            | 11.3 at<br>30.3                                                                                | 1,000  | 54% at 4<br>A g <sup>-1</sup>            | 6.0 M<br>KOH               | 27   |
| PCO//3DPG<br>(pseudocapacitive)                                                     | -                                  | 229 at 2<br>A g <sup>-1</sup>       | 71.58 at<br>1.5                                                                                | -                                                                                              | 2000   | 95% at<br>50 mV s <sup>-1</sup>          | 6.0 M<br>KOH               | 28   |
| AC//LiNi <sub>0.5</sub> Mn <sub>1.5</sub> O <sub>4</sub><br>(Li-ion capacitor)      | -                                  | 124 at<br>100 mA<br>g <sup>-1</sup> | 19 at<br>0.150                                                                                 | 2.5 at 8.0                                                                                     | 3,000  | 81% at 1<br>A g <sup>-1</sup>            | 1.0 M<br>LiPF <sub>6</sub> | 14   |
| NiCoMoS <sub>x</sub> //AC<br>(Asym.<br>Supercapacitor)                              | -                                  | 136 at<br>1 A g <sup>-1</sup>       | 48.2 at<br>0.807                                                                               | -                                                                                              | 10,000 | 91.6% at<br>1 A g <sup>-1</sup>          | 3.0 M<br>KOH               | 29   |

|                                                                                                                                |                                     |                                     |                                   |                    |       |                                      |                                                                  |              |
|--------------------------------------------------------------------------------------------------------------------------------|-------------------------------------|-------------------------------------|-----------------------------------|--------------------|-------|--------------------------------------|------------------------------------------------------------------|--------------|
| <b>CoNi-MOF//AC<br/>(Asym.<br/>Supercapacitor)</b>                                                                             | -                                   | -                                   | 28.5<br>at<br>1.5                 | -                  | 5,000 | 94% at 1<br>A g <sup>-1</sup>        | 1.0 M<br>KOH                                                     | 30           |
| <b>HCO-PFC<sup>d</sup>//FG<sup>f</sup> full<br/>cell</b>                                                                       | 1960 at<br>3 mA<br>cm <sup>-2</sup> | 1633 at<br>3 mA<br>cm <sup>-2</sup> | 79.54 at<br>0.778                 | -                  | 5,000 | 81% at<br>20 A g <sup>-1</sup>       | 6 m KOH<br>+ 0.06 m<br>PFC                                       | 31           |
| <b>GON<sup>e</sup>//RGO (Asym.<br/>Supercapacitor)</b>                                                                         | -                                   | -                                   | 40.5 at<br>0.900                  | 8.526 at<br>9.5    | 5,000 | 87% at<br>10 A g <sup>-1</sup>       | PVA/KOH                                                          | 32           |
| <b>Fe<sub>3</sub>C/CF//Ni<sub>4.5</sub>Co<sub>4.5</sub>-<br/>selenide<br/>nanowires/NPCC<br/>(Battery-<br/>supercapacitor)</b> | -                                   | 113.7 at<br>1 A g <sup>-1</sup>     | 47.4<br>at<br>1.5                 | -                  | 4,000 | 80% at<br>10 A g <sup>-1</sup>       | PVA/KOH                                                          | 33           |
| <b>Ni<sub>3</sub>S<sub>2</sub>/NiV-<br/>LDH/rGO/NF//AC<br/>(Asym.<br/>Supercapacitor)</b>                                      | -                                   | -                                   | 59.4<br>at<br>0.852               | -                  | 8,000 | 98.3% at<br>2 A g <sup>-1</sup>      | 2.0 M<br>KOH                                                     | 34           |
| <b>Cd-GA//Ni(OH)<sub>2</sub> (Ni<br/>superbattery)</b>                                                                         | 50 at<br>0.15 A g <sup>-1</sup>     | -                                   | 51.7 at<br>100 mA g <sup>-1</sup> | 5.4 at 7.8         | 1,000 | 88% at 6<br>A g <sup>-1</sup>        | 6.0 M<br>KOH                                                     | 27           |
| <b>GM-LEG<sup>g</sup> @NiCo-<br/>MOF//AC</b>                                                                                   | -                                   | 3250 at<br>7.5 A g <sup>-1</sup>    | 76.3 at<br>2.25                   | -                  | -     | -                                    | 3.0 M<br>KOH +<br>0.1 M K <sub>4</sub><br>[Fe(CN) <sub>6</sub> ] | 35           |
| <b>Az-GA//Try-Ni-MOF<br/>(Asym.<br/>supercapatteries)</b>                                                                      | -                                   | 319<br>at<br>1 A g <sup>-1</sup>    | 66.55<br>at<br>0.349              | 4.5<br>at<br>11.11 | 5,000 | 92.12%<br>at<br>10 A g <sup>-1</sup> | 3.0 M<br>KOH                                                     | This<br>work |

<sup>a</sup> ZCNM-NS : ZnCo<sub>2</sub>O<sub>4</sub>@NiMoO<sub>4</sub> core-shell nanosheets, <sup>b</sup> AC: activated carbon, <sup>c</sup> NCS/NCO: NiCo<sub>2</sub>S<sub>4</sub>@NiCo<sub>2</sub>O<sub>4</sub> core@shell nanoneedle, <sup>d</sup> PFC : potassium ferricyanide, <sup>f</sup> FG: Fe<sub>2</sub>O<sub>3</sub>/graphene, <sup>e</sup> GON: nitrogen grafted graphene oxinitride, <sup>g</sup> LEG : liquid-phase exfoliated graphene

## References

- 1 H. Yao, F. Zhang, G. Zhang and Y. Yang, *Electrochim. Acta*, 2019, **294**, 286–296.
- 2 G. Xin, Y. Wang, X. Liu, J. Zhang, Y. Wang, J. Huang and J. Zang, *Electrochim. Acta*, 2015, **167**, 254–261.
- 3 J. Liao, Y. Li, Z. Wang, L. Lv and L. Chang, *Mater. Chem. Phys.*, 2021, **258**, 123995.

- 4 T. Fan, S. Tong, W. Zeng, Q. Niu, Y. Liu, C. Y. Kao, J. Liu, W. Huang, Y. Min and A. J. Epstein, *Synth. Met.*, 2015, **199**, 79–86.
- 5 Y. Shabangoli, M. S. Rahmanifar, M. F. El-Kady, A. Noori, M. F. Mousavi and R. B. Kaner, *Adv. Energy Mater.*, 2018, **8**, 1–12.
- 6 S. Nandhini and G. Muralidharan, *Electrochim. Acta*, 2021, **365**, 137367.
- 7 Z. Li, L. Zhang, X. Chen, B. Li, H. Wang and Q. Li, *Electrochim. Acta*, 2019, **296**, 8–17.
- 8 Y. Zhou, X. Cheng, F. Huang, Z. Sha, Z. Han, J. Chen, W. Yang, Y. Yu, J. Zhang, S. Peng, S. Wu, A. Rider, L. Dai and C. H. Wang, *Carbon N. Y.*, 2021, **172**, 272–282.
- 9 W. Wei, B. Liu, Y. Gan, H. Ma, D. Chen, J. Qi and S. Li, *Surf. Coatings Technol.*, , DOI:10.1016/j.surfcoat.2020.126442.
- 10 S. Azizi, M. Seifi and M. B. Askari, *Phys. B Condens. Matter*, 2021, **600**, 412606.
- 11 S. Ye, J. Feng and P. Wu, *ACS Appl. Mater. Interfaces*, 2013, **5**, 7122–7129.
- 12 H. Khani and D. O. Wipf, *ACS Appl. Mater. Interfaces*, 2017, **9**, 6967–6978.
- 13 X. Wu, H. Bin Wu, W. Xiong, Z. Le, F. Sun, F. Liu, J. Chen, Z. Zhu and Y. Lu, *Nano Energy*, 2016, **30**, 217–224.
- 14 N. Arun, A. Jain, V. Aravindan, S. Jayaraman, W. Chui Ling, M. P. Srinivasan and S. Madhavi, *Nano Energy*, 2015, **12**, 69–75.
- 15 Z. Ren, J. Yu, Y. Li and C. Zhi, *Adv. Energy Mater.*, 2018, **8**, 1–12.
- 16 S. Wang, H. Liu, J. Hu, L. Jiang, W. Liu, S. Wang, S. Zhang, J. Yin and J. Lu, *Appl. Surf. Sci.*, 2020, 148216.
- 17 H. Xie, J. Li, C. Chen, F. Dang and Y. He, *Mater. Lett.*, 2021, **282**, 128887.
- 18 B. Wu, F. Zhang, Z. Nie, H. Qian, P. Liu, H. He, J. Wu, Z. Chen and S. Chen, *Electrochim. Acta*, 2021, **365**, 137325.
- 19 K. Tao, X. Han, Q. Ma and L. Han, *Dalt. Trans.*, 2018, **47**, 3496–3502.
- 20 J. Wang, J. Li, Y. Liu, M. Wang and H. Cui, *J. Mater. Sci.*, 2021, **56**, 3011–3023.
- 21 J. Xue, S. Wang, H. Zhang, Y. Song, Y. Li and J. Zhao, *J. Mater. Sci. Mater. Electron.*, , DOI:10.1007/s10854-020-04581-3.
- 22 M. Yi, B. Lu, X. Zhang, Y. Tan, Z. Zhu, Z. Pan and J. Zhang, *Appl. Catal. B Environ.*, 2021, **283**, 119635.
- 23 Y. Meng, D. Yu, Y. Teng, H. Qi, X. Liu, Y. Wu, X. Zhao and X. Liu, *J. Energy Storage*, 2020, **29**, 101195.
- 24 A. Singh, S. K. Ojha, M. Singh and A. K. Ojha, *Electrochim. Acta*, 2020, **349**, 136349.
- 25 A. Alam, G. Saeed and S. Lim, *J. Electroanal. Chem.*, 2020, **879**, 114775.
- 26 A. Shanmugavani and R. K. Selvan, *RSC Adv.*, 2014, **4**, 27022–27029.

- 27 Y. Shabangoli, M. F. El-Kady, M. Nazari, E. Dadashpour, A. Noori, M. S. Rahmanifar, X. Lv, C. Zhang, R. B. Kaner and M. F. Mousavi, *Small*, 2020, **16**, 1–12.
- 28 28 T. Zhai, L. Wan, S. Sun, Q. Chen, J. Sun, Q. Xia and H. Xia, *Adv. Mater.*, 2017, **29**, 1–8.
- 29 W. Yang, H. Guo, L. Yue, Q. Li, M. Xu, L. Zhang, T. Fan and W. Yang, *J. Alloys Compd.*, DOI:10.1016/j.jallcom.2020.154118.
- 30 T. Deng, W. Zhang, O. Arcelus, D. Wang, X. Shi, X. Zhang, J. Carrasco, T. Rojo and W. Zheng, *Commun. Chem.*, 2018, 1.
- 31 31 S. Sun, D. Rao, T. Zhai, Q. Liu, H. Huang, B. Liu, H. Zhang, L. Xue and H. Xia, *Adv. Mater.*, 2020, **32**, 1–11.
- 32 D. Prakash and S. Manivannan, *J. Alloys Compd.*, 2021, **854**, 156853.
- 33 C. Wang, Z. Song, H. Wan, X. Chen, Q. Tan, Y. Gan, P. Liang, J. Zhang, H. Wang, Y. Wang, X. Peng, P. A. van Aken and H. Wang, *Chem. Eng. J.*, 2020, **400**, 125955.
- 34 R. Wang, H. Xuan, G. Zhang, H. Li, Y. Guan, X. Liang, S. Zhang, Z. Wu, P. Han and Y. Wu, *Appl. Surf. Sci.*, 2020, **526**, 146641.
- 35 Z. Andikaey, A. A. Ensafi and B. Rezaei, *Int. J. Hydrogen Energy*, 2020, **45**, 32059–32071.
